# Supplementary material for: NH3-SCR over Cu/SAPO-34 catalysts with various acid contents and low Cu loading
Source: Royal Society of Chemistry journal article supplement (doi:10.1039/c3cy00453h), 2013-01-01
Supplement: c3cy00453h.pdf [file c3cy00453h.pdf]

## Supplementary Information:

### **The NH<sub>3</sub>-SCR over Cu/SAPO-34 catalysts with various acid contents at low Cu loading**

Tie Yu <sup>a</sup>, Jun Wang <sup>a</sup>, Meiqing Shen <sup>a, b\*</sup>, Wei Li<sup>c</sup>

<sup>a</sup> Key Laboratory for Green Chemical Technology of State Education Ministry,  
School of Chemical Engineering & Technology, Tianjin University, Tianjin  
300072, PR China

<sup>b</sup> State Key Laboratory of Engines, Tianjin University, Tianjin 300072, PR China

<sup>c</sup> General Motors Global Research and Development, Chemical Sciences and  
Materials Systems Lab, 3500 Mound Road, Warren, MI 48090, USA

\* Corresponding author: Meiqing Shen

Postal address:

School of Chemical Engineering and Technology, Tianjin University, 92 Weijin Road,  
Nankai District, Tianjin 300072, China

Email: mqshen@tju.edu.cn

Tel./ Fax.: (+86) 22-27892301

## XRD results

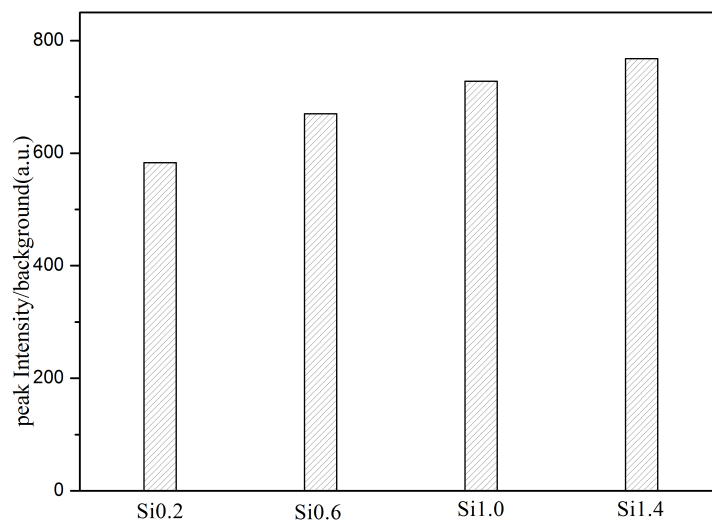

Fig. S1 the intensity of XRD profiles at 21.08° of SAPO-34 supports

The peak at 21.08° of SAPO-34 supports is usually used to compare the crystalline. And it is seen that the four SAPO-34 supports present the increasing crystalline with the increment of Si amounts.

## NO oxidation

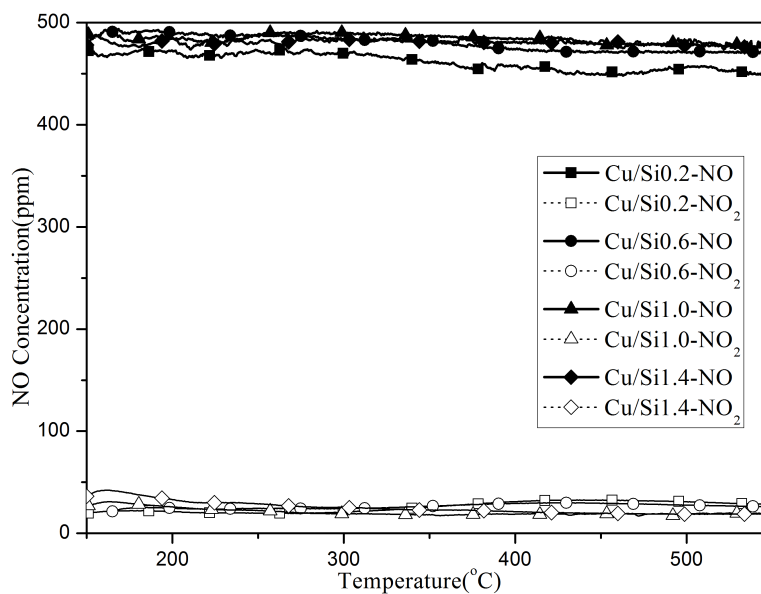

Fig. S2 the NO oxidation results over Cu/SAPO-34 catalysts. The conditions were: the inlets

consisted of 500 ppm NO, 5% O<sub>2</sub> with N<sub>2</sub> as the balance. The flow rate and the volume hourly space velocity in all experiment were controlled at 500ml/min and 300,000h<sup>-1</sup>.

The NO oxidation results over four Cu/SAPO-34 catalysts are listed in Fig. 2S. During the whole temperature range, all catalysts show inferior activities and the NO could hardly be oxidized.

### EPR results

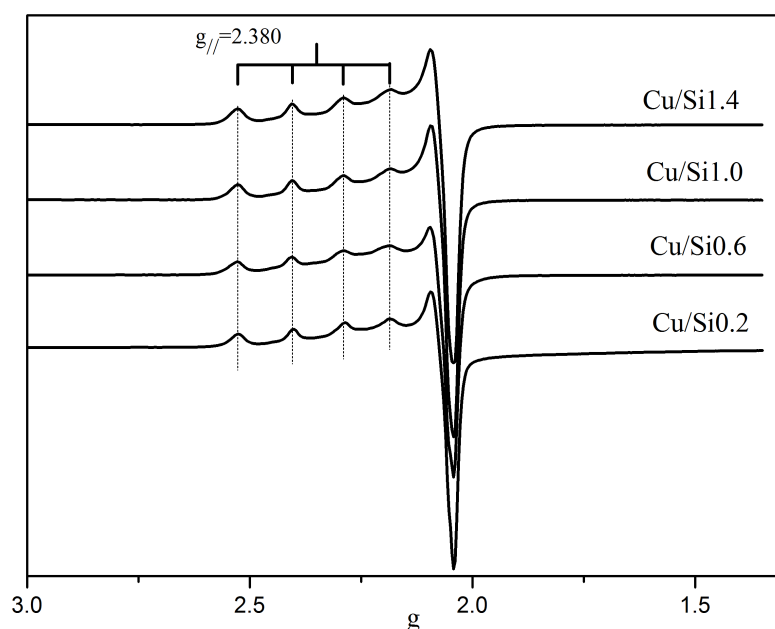

Fig. S3 the EPR spectra of Cu/SAPO-34 catalysts. Prior to the tests, the Cu/SAPO-34 catalysts were vacuumed at  $4.0 \times 10^{-4}$  Pa for 1 hour at 120°C.

The EPR is inactive for CuO, binuclear species, or Cu<sup>+</sup> ions but only active for isolated Cu<sup>2+</sup> species [1]. So the EPR spectra can characterize the hyperfine structure of Cu<sup>2+</sup> species. Fig. S3 shows that the four Cu/SAPO-34 catalysts contain only Cu<sup>2+</sup> species in site ( I ) (Cu<sup>2+</sup> ( I )) [2, 3], displaced from the six-ring into the ellipsoidal cavity.

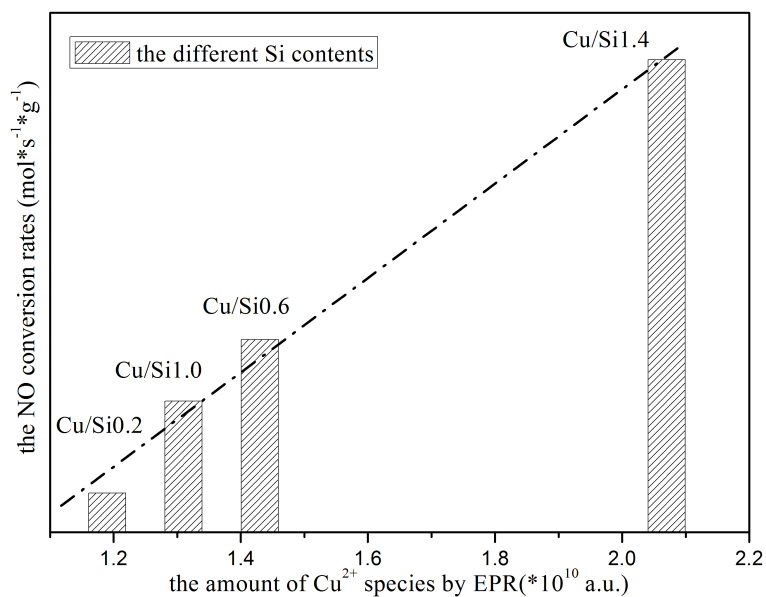

Fig. S4 the relation between the NO conversion rates and the Cu<sup>2+</sup> contents over Cu/SAPO-34 catalysts. The Cu<sup>2+</sup> contents were calculated by deconvolution of the EPR spectra.

The turnover frequency (TOF) is not calculated due to the semi-quantitation of Cu<sup>2+</sup> contents by EPR. The intensity of EPR spectra is related to the Cu<sup>2+</sup> contents, and the deconvolution of EPR spectra is used to represent the Cu<sup>2+</sup> contents over catalysts<sup>1</sup>. Fig. 4S conveys the TOF using the NO rates at 200 °C as a function of Cu<sup>2+</sup> contents by EPR. It is seen that the TOF is a constant and the Cu<sup>2+</sup> species are the active sites for NH<sub>3</sub>-SCR over Cu/SAPO-34 [4].

### NH<sub>3</sub>-TPD

Fig. 3 presents that there are three acid sites for all of the zeolites, and Table 3 shows the sum of adsorbed NH<sub>3</sub> contents. In addition, the adsorbed NH<sub>3</sub> contents at different acid sites are listed in Table S1. It is seen that the strong acid sites for SAPO-34 and Cu/SAPO-34 increase with the raise of Si amounts.

The values of (Si+P)/Al can reflect whether the Si islands exist in SAPO-34 zeolites.

When the (Si+P)/Al is bigger than 1, the Si islands appear as the coordination structure of Si (nOAl, n=0-3). Nevertheless, the SAPO-34 zeolites do not contain Si islands when the the (Si+P)/Al is smaller than 1 [5]. The results of (Si+P)/Al for four SAPO-34 zeolites in Table S1 show that all of them contain less Si islands.

Table S1 the contents of desorbed NH<sub>3</sub> at various acid sites over zeolites

| Sample   | Weak acid sites(mmol/g) | Moderate acid sites(mmol/g) | Strong acid sites(mmol/g) | Sum(mmol /g) | (Si+P)/Al |
|----------|-------------------------|-----------------------------|---------------------------|--------------|-----------|
| Si0.2    | 0.020                   | 0.084                       | 0.093                     | 0.197        | 1.17      |
| Si0.6    | 0.028                   | 0.093                       | 0.149                     | 0.270        | 1.27      |
| Si1.0    | 0.021                   | 0.126                       | 0.151                     | 0.298        | 1.35      |
| Si1.4    | 0.033                   | 0.137                       | 0.165                     | 0.335        | 1.38      |
| Cu/Si0.2 | 0.007                   | 0.028                       | 0.040                     | 0.075        | /         |
| Cu/Si0.6 | 0.007                   | 0.092                       | 0.096                     | 0.195        | /         |
| Cu/Si1.0 | 0.020                   | 0.075                       | 0.107                     | 0.202        | /         |
| Cu/Si1.4 | 0.027                   | 0.088                       | 0.128                     | 0.243        | /         |

### NH<sub>3</sub>-SCR& NH<sub>3</sub> oxidation (SCO) at 410 °C(DRIFT)

Diffuse reflectance infrared Fourier transform spectra (DRIFTS) were carried on FT-IR spectrometer (Nicolet 6700) using a heatable environmental reaction cell with ZnSe windows, which was connected to a gas-dosing system. Prior to the experiments the samples were pretreated at 500 °C for an hour by 2% O<sub>2</sub>/He. The DRIFTS spectra were recorded from 4000 to 650 cm<sup>-1</sup> with a resolution of 2 cm<sup>-1</sup>. Nicolet OMNIC software was used to process data.

The *in situ* DRIFTS were performed to research the influence of acid contents on NH<sub>3</sub>-SCR/NH<sub>3</sub> oxidation, and the background spectra were collected before the samples were exposed to the absorbates. Firstly, The NH<sub>3</sub> chemisorption was

performed in 1% NH<sub>3</sub>/He (500ppm) at 410 °C. A helium flow was used to purge the extra gas-phase NH<sub>3</sub> molecular after the saturation adsorption. Then, the samples were exposed to NO+O<sub>2</sub>/O<sub>2</sub> for NH<sub>3</sub>-SCR/NH<sub>3</sub> oxidation at 410 °C, respectively. The Cu/Si0.2 and Cu/Si1.4 were set as examples to explore the effect of acid contents on their different activities in NH<sub>3</sub>-SCR/NH<sub>3</sub> oxidation.

The ascription of the acid sites can be seen in our previous work [6]. This study pays more attention on the NH<sub>3</sub> adsorbed on Brønsted acid sites.

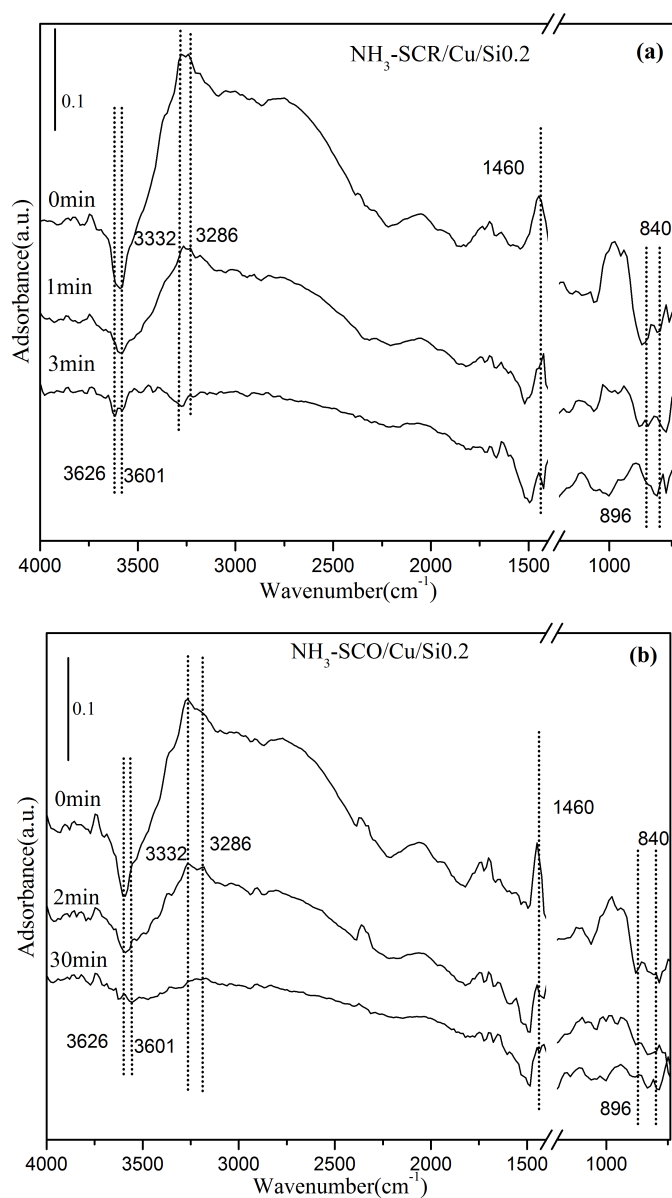

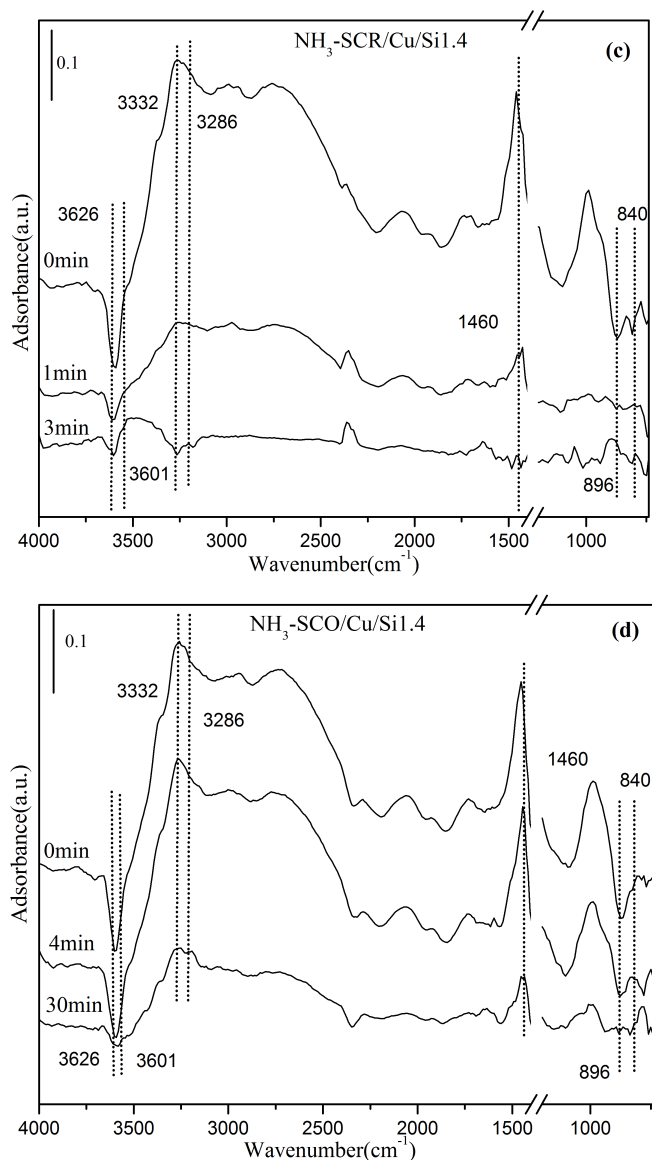

Fig. S5 DRIFTS spectra of NH<sub>3</sub>-SCR/SCO over Cu/Si0.2 and Cu/Si1.4 catalysts at 410°C, units in Kubelka-Munk. (a) NH<sub>3</sub>-SCR over Cu/Si0.2, (b) NH<sub>3</sub> oxidation over Cu/Si0.2, (c) NH<sub>3</sub>-SCR over Cu/Si1.4, (d) NH<sub>3</sub> oxidation over Cu/Si1.4. The conditions: the NH<sub>3</sub> chemisorption was performed in 1% NH<sub>3</sub>/He (500ppm) at 410 °C, then 500ppm NO and 30ml O<sub>2</sub> (2% vol)/He were cut in for (a) and (c); only 30ml O<sub>2</sub> (2% vol)/He were cut in for (b) and (d).

Firstly, the NH<sub>3</sub>-SCR results in Fig. S5a and S5c show that the NH<sub>3</sub> species adsorbed on Brønsted acid sites perform more active in SCR reaction than that in NH<sub>3</sub> oxidation in Fig. S5b and S5d. The NH<sub>3</sub> species adsorbed on Brønsted acid sites take

much more times to participate in  $\text{NH}_3$  oxidation. In addition, the Cu/Si1.4 shows more adsorbed  $\text{NH}_3$  species than Cu/Si0.2 sample due to its high acid contents.

### $\text{NH}_3$ -SCR with $\text{H}_2\text{O}$ and $\text{CO}_2$

The influence of  $\text{H}_2\text{O}$  and  $\text{CO}_2$  to the  $\text{NH}_3$ -SCR activities is shown in Fig. S6. The NO conversions do not decline after the addition of  $\text{H}_2\text{O}$  and  $\text{CO}_2$ . Moreover, the  $\text{H}_2\text{O}$  and  $\text{CO}_2$  in the feed inhibit the formation of by-products during SCR process. All of the results are consisted with our previous paper [6]. The positive reason of  $\text{H}_2\text{O}$  and  $\text{CO}_2$  in the feed over Cu/SAPO-34 catalysts is investigated independently and the paper is conducted recently.

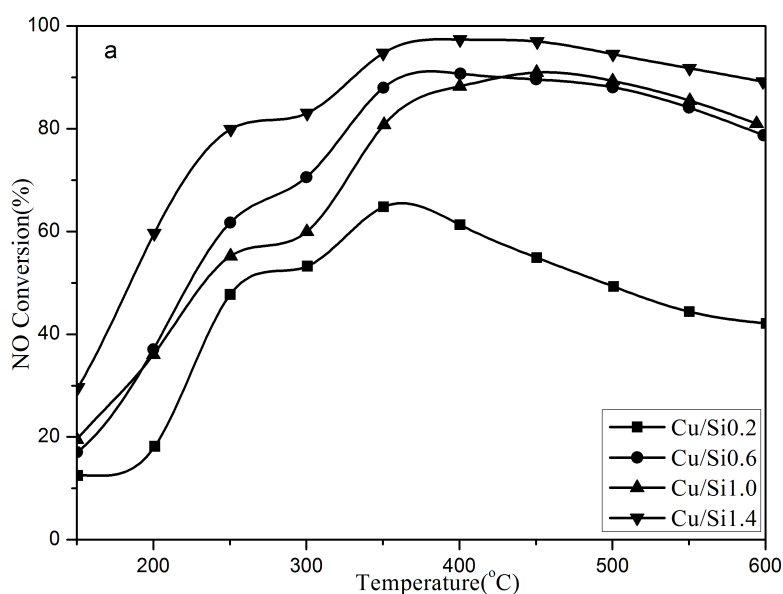



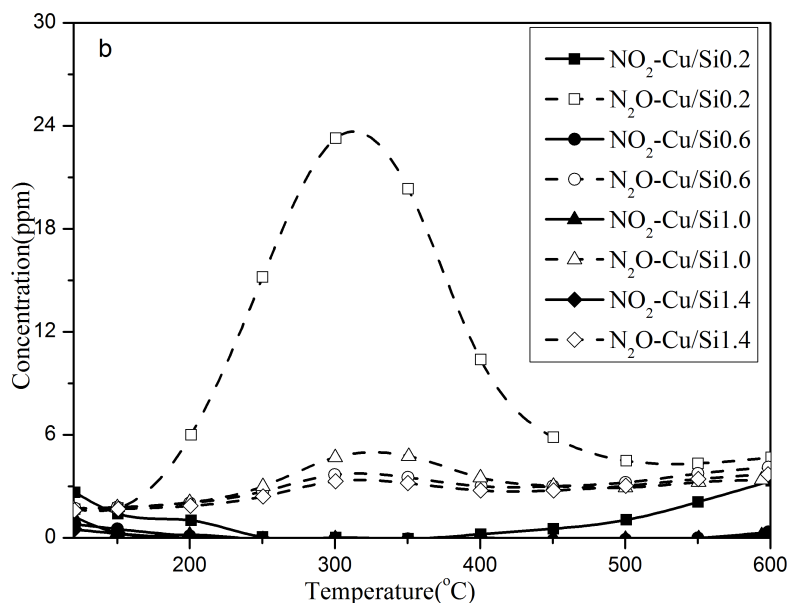

Fig. S6 the results of SCR activities over various Cu/SAPO-34 catalysts with H<sub>2</sub>O and CO<sub>2</sub>. (a) the NO conversion; (b) the concentrations of NO<sub>2</sub>, N<sub>2</sub>O. The feed contains 500 ppm NH<sub>3</sub>, 500 ppm NO, 5% O<sub>2</sub>, 3% H<sub>2</sub>O, 6% CO<sub>2</sub>, N<sub>2</sub> is the balance. The flow rate and the volume hourly space velocity in all experiment were controlled at 500 ml/min and 300,000 h<sup>-1</sup>

### The <sup>29</sup>Si NMR results

The <sup>29</sup>Si MAS NMR (Nuclear Magnetic Resonance) experiments were performed on a Varian Infinity plus 300WB spectrometer at resonance frequencies of 70 MHz for <sup>29</sup>Si nuclei and the <sup>29</sup>Si MAS NMR spectra were recorded with a spinning rate of 5 kHz. Only the <sup>29</sup>Si NMR of Si0.2 and Si1.4 were used to investigate the influence of Si contents on the formation of Si islands in SAPO-34 molecular sieves.

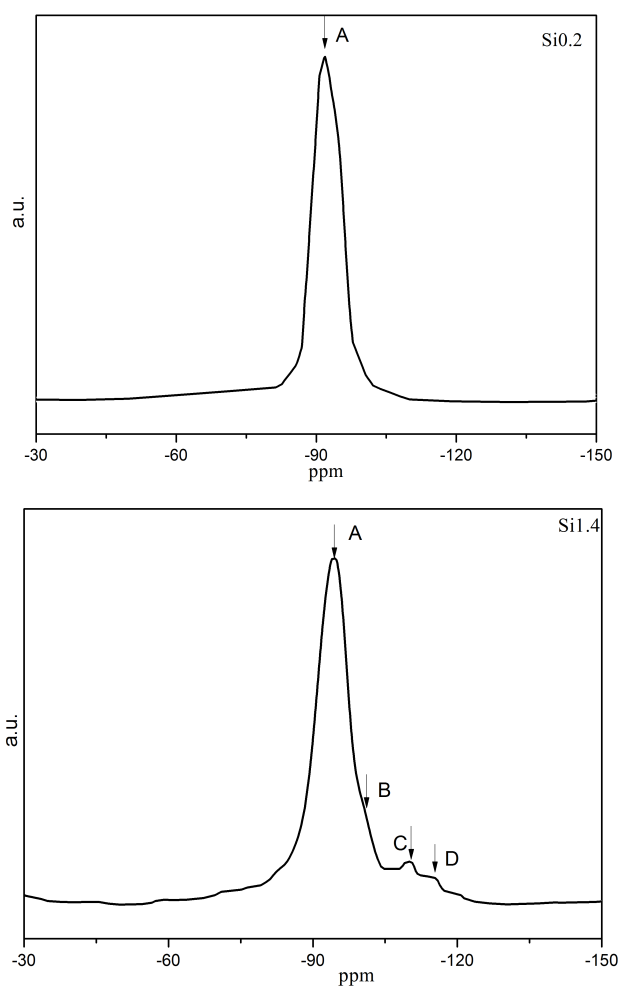

Fig. S7 the  $^{29}\text{Si}$  NMR results of SAPO-34 supports

Our previous work [6] had presented that  $(\text{Si}+\text{P})/\text{Al}$  can reflect the formation of Si islands in SAPO-34. If the mole ratio of the  $(\text{Si} + \text{P})/\text{Al}$  is not bigger than 1, Si atom substitutes P and forms the Si (4OAl) species. If the ratio of  $(\text{Si} + \text{P})/\text{Al}$  is bigger than 1, both the Si atom substitution P and Al occur and the Si islands Si (nOAl) ( $n=0-3$ ) species exist. The results of  $(\text{Si} + \text{P})/\text{Al}$  in Table S1 increase with the increment of Si contents. In addition, the NMR spectrum of Si0.2, in Fig. S7, shows only Si (4OAl) coordination structure (peak A), while the Si1.4 presents Si (4OAl) (peak A), Si (3OAl) (peak B), Si (1OAl) (peak C), and Si (0OAl) (peak D) species [6]. Consequently, it is concluded that the amounts of Si islands increase with the raise of

(Si + P)/Al over the four SAPO-34 zeolites.

## H<sub>2</sub>-TPR

Temperature Programmed Reduction (TPR) experiments were performed in a U-shaped tubular quartz reactor. Prior to reduction, the samples were first treated at 500 °C under a flow of 30 ml/min 2% O<sub>2</sub>/N<sub>2</sub> and kept for 30 min. Then, the samples were cooled down to room temperature following by purging in N<sub>2</sub> with a flow of 30 ml/min. In the temperature programmed reduction process, the samples were heated to 900 °C at a ramping rate of 5 °C/min under a flow of 12 ml/min 5% H<sub>2</sub>/N<sub>2</sub>. The consumption of hydrogen was monitored by a thermal conductivity detector. The results are shown in Fig. S8.

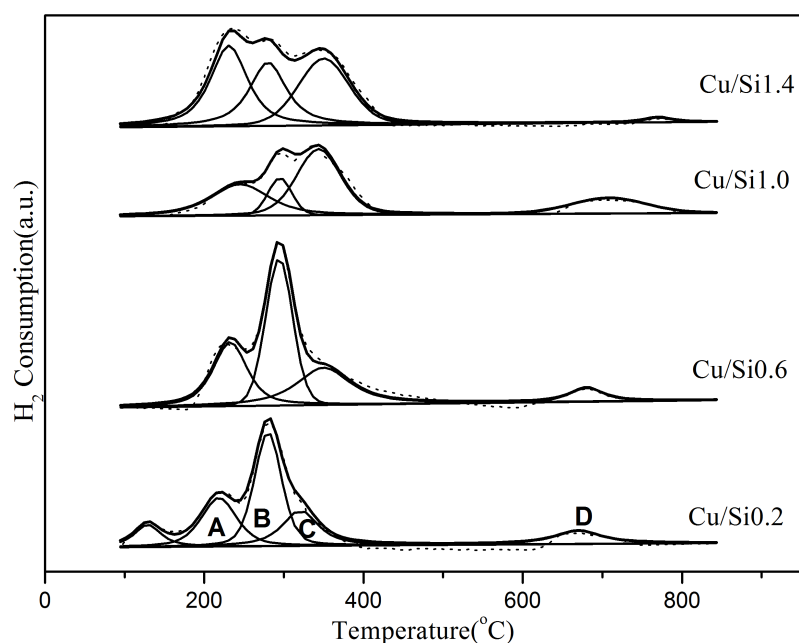

Fig. S8 H<sub>2</sub>-TPR results of all Cu/SAPO-34 catalysts. The feed contained 5 vol.% H<sub>2</sub>/N<sub>2</sub> and fed at a flow rate of 12cm<sup>3</sup>/ min and the experiment was performed from 30 °C to 900 °C with the heatingup rate of 5 °C /min.

In Fig. S8, the H<sub>2</sub> consumption peak from 200 °C to 600 °C can be divided into three peaks after deconvolution and curve stochastic fitting procedures by Lorentzian method, and the TPR curve of HSAPO-34 was subtracted as the baseline of the Cu/SAPO-34 sample. The peak at the lower temperature (peak A) represents the reduction of isolated Cu<sup>2+</sup> to Cu<sup>+</sup> [7-13], the moderate one (peak B) represents the reduction of the bulk Copper Oxide in zeolites from CuO to Cu<sup>0</sup> [11, 13-14], and the third one (peak C) at the higher temperature comes from the reduction from Cu<sup>+</sup> to Cu<sup>0</sup> [7-13]. This H<sub>2</sub> consumption peak can be assigned to the reduction of “L (Low)-Cu<sup>+</sup>”, including the one obtained from the reduction of isolated Cu<sup>2+</sup> and the original Cu<sup>+</sup> existed on the framework of SAPO-34. Another H<sub>2</sub> consumption peak above 700 °C (peak D) can be attributed to the reduction of highly stable Cu<sup>+</sup> to Cu<sup>0</sup> [11-12, 15-16], which is named as “H (High)-Cu<sup>+</sup>”. Bulánek [17] and Torre [12, 13] found that the reducibility of Cu species in Cu-zeolites can be changed in a wide range by the coordination to zeolite framework oxygen. The more Al existed in the zeolites can cause higher negative charge of the zeolites, which strengthened the ligand of Cu species to the matrix. So the H<sub>2</sub> consumption peaks, reduction of Cu<sup>+</sup> to Cu<sup>0</sup> in Cu-zeolites, were above 600 °C. Richter [16] found that the Cu<sup>+</sup> species were reduced at 525 °C and 770 °C, and the H<sub>2</sub> consumption at the higher temperature was due to the formation of stable Cu<sup>+</sup> species on Cu-zeolites. It is deduced that the H (High)-Cu<sup>+</sup> coordinated to framework oxygen is more stable and more difficult to be reduced for the higher negative charge of zeolites. Moreover, the Cu/Si0.2 exhibits peaks at 130 °C, which are due to the reduction of surface CuO cluster to Cu<sup>0</sup> [9, 10, 12,

<sup>13, 16]</sup>. Moreover, it is seen that the support has great impact on Cu species over the four Cu/SAPO-34 samples in Table S2. The influence of acid contents on the various Cu species by ion-exchange method had been discussed in the previous work <sup>[6]</sup>.

Table S2 the contents of different Cu species on Cu/SAPO-34 from the H<sub>2</sub>-TPR results

| Sample   | Copper Species Content (μmol/g Cu/SAPO-34) |                           |                           |                 |        |
|----------|--------------------------------------------|---------------------------|---------------------------|-----------------|--------|
|          | Surface CuO Cluster                        | Isolated Cu <sup>2+</sup> | Bulk Copper Oxide in Cage | Cu <sup>+</sup> | Amount |
| Cu/Si0.2 | 0.425                                      | 2.171                     | 1.793                     | 0.566           | 4.956  |
| Cu/Si0.6 | 0                                          | 2.832                     | 2.124                     | 0.661           | 5.616  |
| Cu/Si1.0 | 0                                          | 2.360                     | 0.472                     | 2.171           | 5.002  |
| Cu/Si1.4 | 0                                          | 4.059                     | 1.652                     | 0               | 5.616  |

Explanation: The H<sub>2</sub>-TPR of CuO is used to get the semi-quantitative assessment of different Cu species in Cu/SAPO-34. Especially, the Cu<sup>+</sup> contents are calculated as follows: Amount of Cu<sup>+</sup> = [H<sub>2</sub> consumption<sub>(peak C)</sub> + H<sub>2</sub> consumption<sub>(peak D)</sub> - H<sub>2</sub> consumption<sub>(peak A)</sub>]

In addition, the main difference of this work is to further study the influence of acid contents on the SCR activity of Cu/SAPO-34, so the sample system is well designed. The Cu loading is controlled at low level to stress the role of acid content. And the following results in Fig. S9 show that none of the Cu species presents the direct relation with NO conversion as that with acid content in Fig. 6.

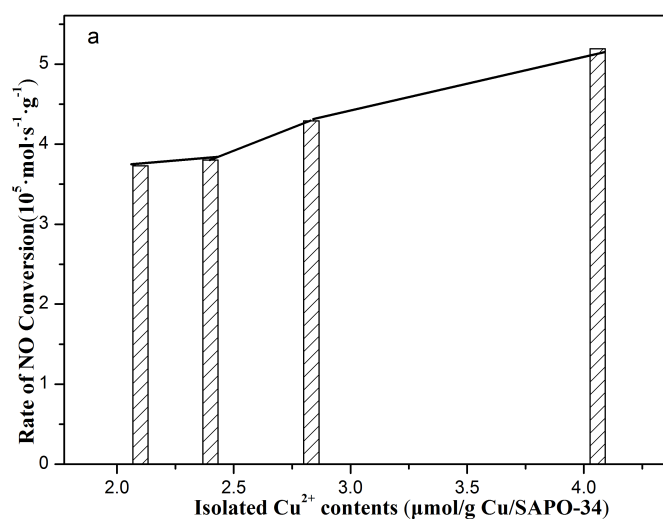

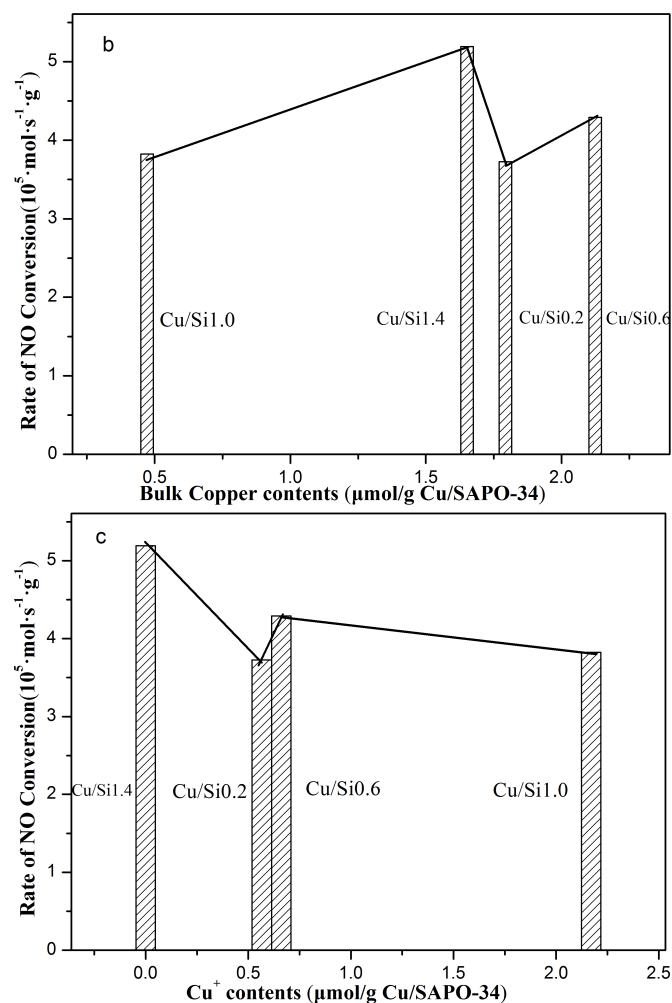

Fig. S9 the correlation of rate of NO conversion on Cu/SAPO-34 samples at 250 °C with respect to (a) Isolated  $\text{Cu}^{2+}$  contents; (b) Bulk Copper Oxide contents; (c)  $\text{Cu}^+$  contents.

## Reference

- [1] A. V. Kucherov, C. P. Hubbard, T. N. Kucherova, M. Shelef, *Appl. Catal., B*, 1996, 7, 285.
- [2] M. Zamadics, X. Chen, L. Kevan, *J. Phys. Chem.*, 1992, 96, 2652.
- [3] M. Zamadics, X. Chen, L. Kevan, *J. Phys. Chem.*, 1992, 96, 5488.
- [4] J. Xue, X. Wang, G. Qi, J. Wang, M. Shen, W. Li, *J. Catal.*, 2013, 297, 56.
- [5] L. Xu, A. Du, Y. Wei, Y. Wang, Z. Yu, Y. He, X. Zhang, Z. Liu, *Microporous Mesoporous Mater.*, 2008, 115, 332.

- [6] J. Wang, T. Yu, X. Wang, G. Qi, J. Xue, M. Shen, W. Li, *Appl. Catal., B*, 2012, 127, 137.
- [7] A. Sultana, T. Nanba, M. Haneda, M. Sasaki, H. Hamada, *Appl. Catal., B*, 2010, 101, 61-67.
- [8] Y. Wan, J. Ma, Z. Wang, W. Zhou, S. Kaliaguine, *J. Catal.*, 2004, 227, 242-252.
- [9] J.Y. Yan, G.D. Lei, W.M.H. Sachtler, H.H. Kung, *J. Catal.*, 1996, 161, 43-54.
- [10] J.Y. Yan, W.M.H. Sachtler, H.H. Kung, *Catal. Today*, 1997, 33, 279-290.
- [11] M. Richter, M.J.G. Fait, R. Eckelt, *Appl. Catal. B*, 2007, 73, 269-281.
- [12] C. Torre-Abreu, M.F. Ribeiro, C. Henriques, G. Delahay, *Appl. Catal. B*, 1997, 12, 249-262.
- [13] C. Torre-Abreu, M.F. Ribeiro, C. Henriques, G. Delahay, *Appl. Catal. B*, 1997, 14, 261-272.
- [14] R. Kefirov, A. Penkova, K. Hadjiivanov, S. Dzwigaj, M. Che. *Micropor. Mesopor. Mater.*, 2008, 116, 180-187.
- [15] D. Berthomieu, G. Delahay, *Catal. Rev.*, 2006, 48, 269-313.
- [16] M. Richter, M.J.G. Fait, R. Eckelt, M. Schneider, J. Radnik, D. Heidemann, R. Fricke, *J. Catal.*, 2007, 245, 11-24.
- [17] R. Bulánek, B. Wichterlová, Z. Sobalík, J. Tichy, *Appl. Catal. B*, 2001, 31, 13-25.
